# Supplementary material for: Resistance evaluation of sweet orange (Citrus sinensis) cultivars to Xanthomonas citri subsp. citri
Source: Research Square preprint supplement (doi:10.21203/rs.3.rs-3200762/v1), 2023-09-13
Supplement: Supplementary file 1 [file 69c37fb0f85e99ac9b2cc15e.docx]

**Supplementary Materials**

**Resistance evaluation of sweet orange (*Citrus* *sinensis*) cultivars to *Xanthomonas* *citri* subsp. c*itri***

Danielle S. Y. Nanami1, Gabriela Bissoli1, Nayara N. Souza1, Priscila Rosseto1, Cristiane Mendes da Silva-Reis1, Carlos A. Zanutto1*, Clive H. Bock2 and William M. C. Nunes1

1UEM - Departamento de Agronomia, Núcleo de Pesquisa em Biotecnologia Aplicada, Av. Colombo, 5790 – 87020-900 – Maringá, PR – Brazil.

2United States Department of Agriculture – USDA - Agricultural Research Service –ARS - Byron, Georgia, USA.

*corresponding author e-mail: [cazanutto@uem.br](mailto:cazanutto@uem.br)

**Supplementary Table S1.** The generalized linear mixed models compared using a Gaussian inverse distribution to explain the effects of various fixed variables and covariates on the size of canker lesions on inoculated leaves.

| **ID** | **Modela** |
| --- | --- |
|  |  |
|  |  |
|  |  |
|  |  |

a In the models, α_*i* represents the effects due to *i*-th variety, *θ*_*j* the effects due to the *j*-th day after inoculation, *u*_*k* is the effect of the random part on the *k*-th leaf.

**Supplementary Table S2.** The estimates for the different variables in the fixed component of the selected model in trial 1.

| **Variable** | **Estimate** | **Standard Error** | **DF** | **t Value** | **Pr > |t|** |
| --- | --- | --- | --- | --- | --- |
| Intercept | 1.0724 | 0.01727 | 193 | 62.11 | <.0001 |
| Pera 59 | 0.05267 | 0.02153 | 420 | 2.45 | 0.0149 |
| Pera Arapongas | 0.02156 | 0.02153 | 420 | 1.00 | 0.3174 |
| Pera Bianchi/CC | -0.00222 | 0.02153 | 420 | -0.10 | 0.9179 |
| Pera EEL | -0.01533 | 0.02153 | 420 | -0.71 | 0.4768 |
| Hamlin | 0.1020 | 0.02153 | 420 | 4.74 | <.0001 |
| Pera IAC | -0.02200 | 0.02153 | 420 | -1.02 | 0.3076 |
| Pera IAC 2000/1 | 0.01522 | 0.01865 | 420 | 0.82 | 0.4148 |
| Pera Ipiguá | 0.002889 | 0.02153 | 420 | 0.13 | 0.8933 |
| Pera M5 | -0.01044 | 0.02153 | 420 | -0.49 | 0.6279 |
| Pera Ovale Siracusa | -0.01067 | 0.02153 | 420 | -0.50 | 0.6206 |
| Pera Ovale | 0.03533 | 0.02153 | 420 | 1.64 | 0.1016 |
| Vermelha | 0.05600 | 0.02153 | 420 | 2.60 | 0.0096 |
| Pera 58 | 0 | . | . | . | . |
| 8 | 0.2083 | 0.01287 | 193 | 16.19 | <.0001 |
| 12 | 0.3113 | 0.01287 | 193 | 24.19 | <.0001 |
| 16 | 0.4333 | 0.01287 | 193 | 33.67 | <.0001 |
| 20 | 0.5241 | 0.01287 | 193 | 40.73 | <.0001 |
| 4 | 0 | . | . | . | . |

**Supplementary Table S3.** The pairwise differences in trial 1 between the canker lesion diameter means for the 12 Pera sweet orange cultivars (and 2 controls) based on a Tukey-Kramer analysis. Only significant pairwise differences are presented.

| **Cultivar** | **Cultivar** | **Estimate** | **Standard Error** | **DF** | **t Value** | **Pr > |t|** |
| --- | --- | --- | --- | --- | --- | --- |
| 59 | Bianch | 0.05489 | 0.02153 | 420 | 2.55 | 0.0112 |
| 59 | EEL | 0.06800 | 0.02153 | 420 | 3.16 | 0.0017 |
| 59 | Hamlin | -0.04933 | 0.02153 | 420 | -2.29 | 0.0225 |
| 59 | IAC | 0.07467 | 0.02153 | 420 | 3.47 | 0.0006 |
| 59 | IAC 2000/1 | 0.03744 | 0.01865 | 420 | 2.01 | 0.0453 |
| 59 | Ipiguá | 0.04978 | 0.02153 | 420 | 2.31 | 0.0213 |
| 59 | M5 | 0.06311 | 0.02153 | 420 | 2.93 | 0.0036 |
| 59 | Ovale Siracusa | 0.06333 | 0.02153 | 420 | 2.94 | 0.0035 |
| 59 | 58 | 0.05267 | 0.02153 | 420 | 2.45 | 0.0149 |
| Arapongas | Hamlin | -0.08044 | 0.02153 | 420 | -3.74 | 0.0002 |
| Arapongas | IAC | 0.04356 | 0.02153 | 420 | 2.02 | 0.0438 |
| Bianchi/CC | Hamlin | -0.1042 | 0.02153 | 420 | -4.84 | <.0001 |
| Bianchi/CC | Vermel | -0.05822 | 0.02153 | 420 | -2.70 | 0.0071 |
| EEL | Hamlin | -0.1173 | 0.02153 | 420 | -5.45 | <.0001 |
| EEL | Ovale | -0.05067 | 0.02153 | 420 | -2.35 | 0.0191 |
| EEL | Vermel | -0.07133 | 0.02153 | 420 | -3.31 | 0.0010 |
| Hamlin | IAC | 0.1240 | 0.02153 | 420 | 5.76 | <.0001 |
| Hamlin | IAC 2000/1 | 0.08678 | 0.01865 | 420 | 4.65 | <.0001 |
| Hamlin | Ipiguá | 0.09911 | 0.02153 | 420 | 4.60 | <.0001 |
| Hamlin | M5 | 0.1124 | 0.02153 | 420 | 5.22 | <.0001 |
| Hamlin | Ovale Siracusa | 0.1127 | 0.02153 | 420 | 5.23 | <.0001 |
| Hamlin | Ovale | 0.06667 | 0.02153 | 420 | 3.10 | 0.0021 |
| Hamlin | Vermelha | 0.04600 | 0.02153 | 420 | 2.14 | 0.0332 |
| Hamlin | 58 | 0.1020 | 0.02153 | 420 | 4.74 | <.0001 |
| IAC | IAC 20 | -0.03722 | 0.01865 | 420 | -2.00 | 0.0466 |
| IAC | Ovale | -0.05733 | 0.02153 | 420 | -2.66 | 0.0081 |
| IAC | Vermelha | -0.07800 | 0.02153 | 420 | -3.62 | 0.0003 |
| IAC 2000/1 | Vermelha | -0.04078 | 0.01865 | 420 | -2.19 | 0.0293 |
| Ipiguá | Vermelha | -0.05311 | 0.02153 | 420 | -2.47 | 0.0141 |
| M5 | Ovale | -0.04578 | 0.02153 | 420 | -2.13 | 0.0341 |
| M5 | Vermelha | -0.06644 | 0.02153 | 420 | -3.09 | 0.0022 |
| Ovale Siracusa | Ovale | -0.04600 | 0.02153 | 420 | -2.14 | 0.0332 |
| Ovale Siracusa | Vermelha | -0.06667 | 0.02153 | 420 | -3.10 | 0.0021 |
| Vermelha | 58 | 0.05600 | 0.02153 | 420 | 2.60 | 0.0096 |

**Supplementary Table S4.** The estimates for the different variables in the fixed component of the selected model in trial 1.

| **Variable** | **Estimate** | **Standard Error** | **DF** | **t Value** | **Pr > |t|** |
| --- | --- | --- | --- | --- | --- |
| Intercept | 1.1401 | 0. 03198 | 29 | 35.66 | <.0001 |
| Pera 59 | -0. 01467 | 0. 04388 | 584 | -0. 33 | 0. 7383 |
| Pera Arapongas | -0. 01289 | 0. 04388 | 584 | -0.29 | 0. 7691 |
| Pera Bianchi/CC | -0. 09422 | 0. 04388 | 584 | -2.15 | 0. 0322 |
| Pera EEL | -0. 09467 | 0. 04388 | 584 | -2.16 | 0. 0314 |
| Hamlin | 0. 003556 | 0. 04388 | 584 | 0.08 | 0. 9354 |
| Pera IAC | -0. 1460 | 0. 04388 | 584 | -3.33 | 0. 0009 |
| Pera IAC 2000/1 | -0. 06956 | 0. 03800 | 584 | -1.83 | 0. 0677 |
| Pera Ipiguá | -0. 04133 | 0. 04388 | 584 | -0.94 | 0. 3466 |
| Pera M5 | -0. 00200 | 0. 04388 | 584 | -0.05 | 0. 9637 |
| Pera Ovale Siracusa | 0. 02978 | 0. 04388 | 584 | 0.68 | 0. 4976 |
| Pera Ovale | 0. 001889 | 0. 04388 | 584 | -0.59 | 0. 5537 |
| Vermelha | -0. 05978 | 0. 04388 | 584 | -1.36 | 0. 1736 |
| 58 | 0 | . | . | . | . |
| 8 | 0. 1200 | 0. 01251 | 584 | 9.82 | <.0001 |
| 12 | 0. 2017 | 0. 01251 | 584 | 16.50 | <.0001 |
| 16 | 0. 2744 | 0. 01251 | 584 | 22.46 | <.0001 |
| 20 | 0.3699 | 0.01251 | 584 | 30.27 | <.0001 |
| 4 | 0 | . | . | . | . |

**Supplementary Table S5.** The pairwise differences in trial 2 between the canker lesion diameter means for the 12 Pera sweet orange cultivars (and 2 controls) based on a Tukey-Kramer analysis. Only significant pairwise differences are presented.

| **Cultivar** | **Cultivar** | **Estimate** | **Standard Error** | **DF** | **t Value** | **Pr > |t|** |
| --- | --- | --- | --- | --- | --- | --- |
| 59 | IAC | 0.1313 | 0. 04388 | 584 | 2.99 | 0. 0029 |
| Arapon | IAC | 0.1331 | 0.04388 | 584 | 3.03 | 0.0025 |
| Bianch | Hamlin | -0.09778 | 0.04388 | 584 | -2.23 | 0.0262 |
| Bianch | M5 | -0.09222 | 0.04388 | 584 | -2.10 | 0.0360 |
| Bianch | O. Sir | -0.1240 | 0.04388 | 584 | -2.83 | 0.0049 |
| Bianch | 58 | -0.09422 | 0.04388 | 584 | -2.15 | 0.0322 |
| EEL | Hamlin | -0.09822 | 0.04388 | 584 | -2.24 | 0.0256 |
| EEL | M5 | -0.09267 | 0.04388 | 584 | -2.11 | 0.0351 |
| EEL | O. Sir | -0.1244 | 0.04388 | 584 | -2.84 | 0.0047 |
| EEL | 58 | -0.09467 | 0.04388 | 584 | -2.16 | 0.0314 |
| Hamlin | IAC | 0.1496 | 0.04388 | 584 | 3.41 | 0.0007 |
| IAC | IAC 20 | -0.07644 | 0.03800 | 584 | -2.01 | 0.0447 |
| IAC | Ipiguá | -0.1047 | 0.04388 | 584 | -2.39 | 0.0174 |
| IAC | M5 | -0.1440 | 0.04388 | 584 | -3.28 | 0.0011 |
| IAC | O. Sir | -0.1758 | 0.04388 | 584 | -4.01 | <.0001 |
| IAC 20 | O. Sir | -0.09933 | 0.03800 | 584 | -2.61 | 0.0092 |
| O. Sir | Vermelha | 0.08956 | 0.04388 | 584 | 2.04 | 0.0417 |


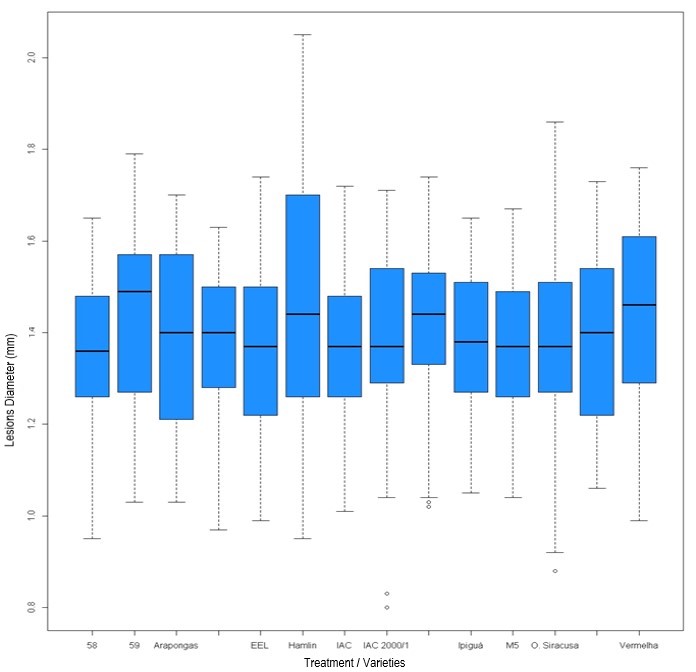


**Supplementary Figure S1.** Box-plots showing the characteristics of the lesion diameter samples at 20 days for each of the 12 Pera sweet orange cultivars (and 2 controls) in trial 1.


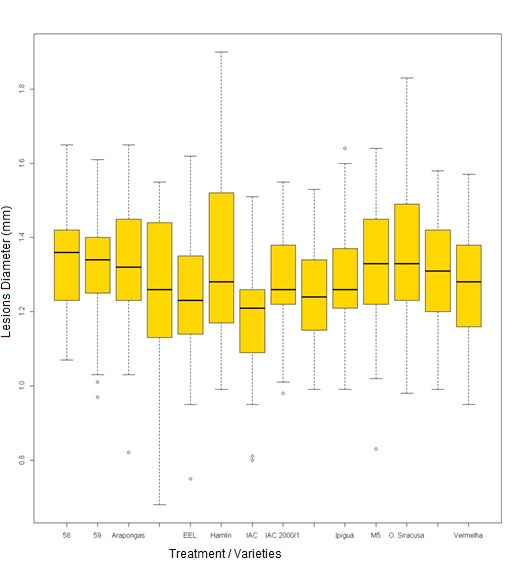


**Supplementary Figure S2.** Box-plots showing the characteristics of the lesion diameter samples at 20 days for each of the 12 Pera sweet orange cultivars (and 2 controls) in trial.2.


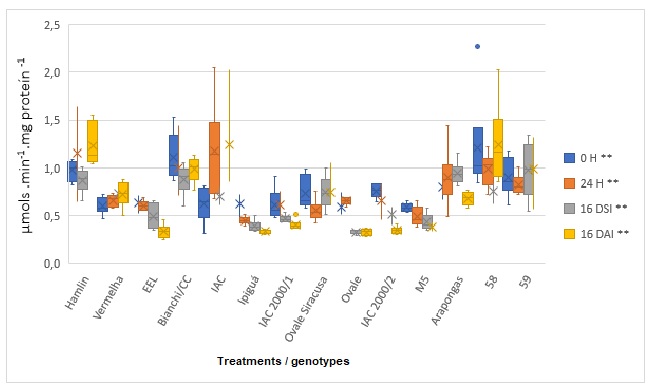


**Supplementary Figure S3.** Box plots showing the activity of peroxidase in 12 Pera sweet orange cultivars (and 2 controls) inoculated with *Xanthomonas citri* subsp. *citri*, at different times after inoculation (H: hours after inoculation, DSI: Days without inoculation, DAI: days after inoculation). Bars indicate the mean ± standard deviation.


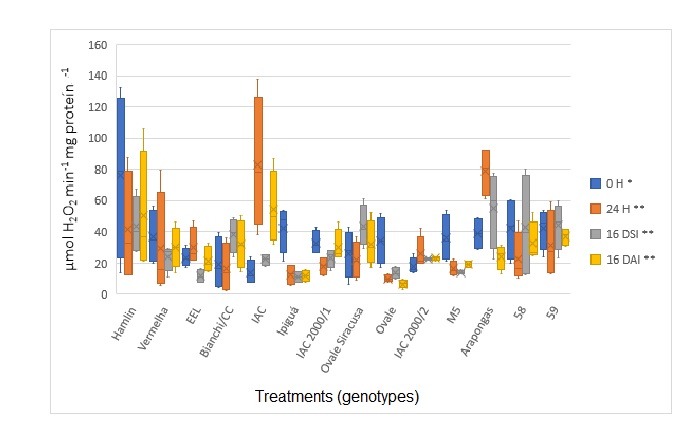


**Supplementary Figure S4.** Box plots showing the activity of catalase in 12 Pera sweet orange cultivars (and 2 controls) inoculated with *Xanthomonas citri* subsp. *citri*, at different times after inoculation (H: hours after inoculation, DSI: Days without inoculation, DAI: days after inoculation). Bars indicate the mean ± standard deviation.


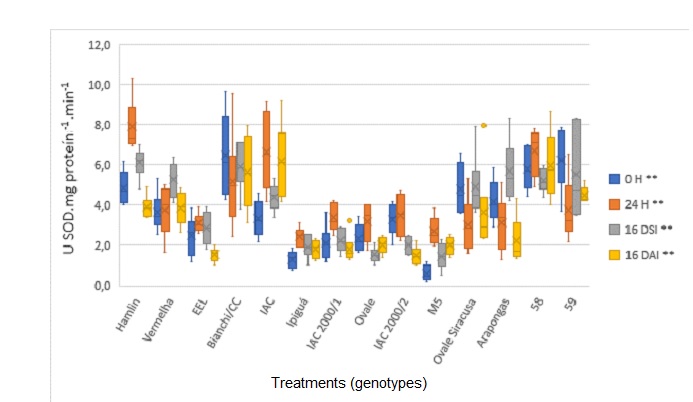


**Supplementary Figure S5.** Box plots showing the activity of superoxide dismutase in 12 Pera sweet orange cultivars (and 2 controls) inoculated with *Xanthomonas citri* subsp. *citri*, at different times after inoculation (H: hours after inoculation, DSI: Days without inoculation, DAI: days after inoculation). Bars indicate the mean ± standard deviation.
